# Supplementary material for: Time-dependent tuning of balance control and aftereffects following optical flow perturbation training in older adults
Source: J Neuroeng Rehabil. 2019 Jul 1;16:81. doi: 10.1186/s12984-019-0555-3 (PMC6604156; doi:10.1186/s12984-019-0555-3)
Supplement: Supplementary file 2 — Individual subject data for primary outcome measures. (XLSX 28 kb) [file 12984_2019_555_MOESM2_ESM.xlsx]

## Sheet: Sheet1
	Antagonist Coactivation																								Muscle activation								Margin of Stability (MoS)
Subject ID	VLMH_stance_b	VLMH_stance_e	VLMH_stance_l	VLMH_stance_p	VLMH_swing_b	VLMH_swing_e	VLMH_swing_l	VLMH_swing_p	TAMG_stance_b	TAMG_stance_e	TAMG_stance_l	TAMG_stance_p	TAMG_swing_b	TAMG_swing_e	TAMG_swing_l	TAMG_swing_p	TASOL_stance_b	TASOL_stance_e	TASOL_stance_l	TASOL_stance_p	TASOL_swing_b	TASOL_swing_e	TASOL_swing_l	TASOL_swing_p	GMStance_b	GMStance_e	GMStance_l	GMStance_p	GMSwing_b	GMSwing_e	GMSwing_l	GMSwing_p	MoSHeel_b	MoSHeel_e	MoSHeel_l	MoSHeel_p	VarMoSHeel_b	VarMoSHeel_e	VarMoSHeel_l	VarMoSHeel_p	MoSMin_b	MoSMin_e	MoSMin_l	MoSMin_p	VarMoSMin_b	VarMoSMin_e	VarMoSMin_l	VarMoSMin_p	MoSMin_b_np
A	43.6247	55.1406	63.4449	71.9054	49.9866	56.635	43.9049	38.8645	3.91736	32.7028	5.29908	0.200574	0	26.0323	1.71418	0.0397208	9.50735	39.0642	10.8698	4.36504	11.7924	75.1454	63.1187	65.8861	2.35367	1.88844	1.3388	1.16837	1.0725	1.69528	0.646331	0.529375	16.1216	15.9889	15.016	14.3969	1.33326	6.02245	4.63167	1.56073	13.1905	10.2334	10.1923	11.4994	1.16887	5.2933	3.85566	1.36537	11.9967
B	0.603219	0	0	0	25.4529	24.5778	27.754	28.0013	1.12626	1.87499	3.55435	0.945831	49.1525	49.654	59.4172	50.8805	5.54851	12.414	12.555	1.11184	13.2426	14.7846	19.7067	14.3046	2.5656	2.38632	2.43557	2.44108	0.83068	1.08007	1.38211	1.14587	14.6153	15.1786	16.1621	15.2316	2.19595	2.3499	2.69247	2.34829	12.059	12.3957	12.9372	12.5037	1.03267	1.02044	1.30951	1.22754	13.1519
C	14.6402	57.3021	39.076	15.5326	38.3998	55.265	41.8044	34.9125	0.274158	18.5943	12.5965	3.52088	0.164963	3.56068	8.89849	3.98259	1.1007	15.9383	10.4534	6.94259	0	0.00527637	0.711252	0.0619268	1.33878	2.71356	2.15898	1.46732	2.33479	4.70037	2.62524	2.1274	16.8781	18.453	17.9402	17.2627	1.19492	2.21144	2.59493	1.45374	13.1461	14.5973	13.8207	13.509	1.09301	1.73827	1.91673	1.20615	13.9566
D	58.8186	74.5668	51.5869	40.799	42.6831	62.4495	43.7404	41.6499	12.4996	47.5663	19.6255	7.21652	9.51311	32.4848	14.449	4.66581	19.7992	60.5794	28.3194	12.1292	17.57	27.3796	16.6699	10.37	2.21765	3.29693	2.86468	2.458	1.21187	2.33869	1.59569	1.31007	14.6825	18.6328	16.3518	14.2664	1.15624	3.42703	1.83454	1.10101	11.6058	14.4679	13.1685	11.3708	0.997963	2.61208	1.46362	0.966092	12.7694
E	7.43132	21.4828	2.3448	0	43.0207	49.9088	36.1704	26.2912	7.57804	28.9399	18.4821	2.87031	16.6562	25.5327	37.5402	28.0176	15.6079	38.5678	20.3735	5.83199	22.5982	25.2543	28.5309	22.7263	1.94336	2.05148	3.15029	2.79866	1.44194	2.00838	2.93256	2.58138	11.0539	12.4197	10.632	10.1328	1.435	2.34166	3.67614	1.80554	8.70653	9.36103	6.99718	7.96376	1.19954	2.27226	3.42991	1.5869	9.62645
F	28.9077	62.7259	51.5463	29.2292	49.3742	53.3543	48.896	42.2863	7.64073	9.17443	6.25888	9.66497	6.38891	32.4706	12.403	3.42094	24.7874	31.8903	12.2265	10.2556	10.5375	9.94257	7.83011	3.82708	1.84495	1.65819	3.25638	3.67101	1.84273	2.36899	2.10493	2.21318	12.2724	12.1426	11.9282	12.6919	2.27531	4.16669	3.09237	2.32665	9.67645	8.51037	8.95583	10.0626	1.66468	2.76173	2.29584	1.85352	11.2965
G	60.9379	68.7928	56.6289	28.3086	53.0022	60.0287	52.8938	48.2748	7.0413	28.7791	17.898	3.80947	19.7649	24.4359	16.3145	17.311	10.2636	37.9619	20.5057	5.48641	4.32029	20.025	10.0741	5.16965	2.0907	2.43041	2.49693	2.29699	1.39257	2.30572	2.06578	1.6457	13.4393	15.8429	15.2383	13.9994	1.25417	3.18093	2.05691	1.39245	11.1497	12.8304	12.7413	11.7767	0.939854	2.44642	1.70884	1.12558	11.7642
H	12.1085	46.2315	27.6836	2.76211	39.4017	46.49	50.7068	37.9481	10.3692	33.0643	24.1374	7.88345	0	2.0999	0.0559204	0	20.0573	44.3552	32.8238	14.466	2.06367	8.96313	2.83451	0.354977	2.31789	2.53741	2.35659	2.29313	1.04171	1.49726	1.06319	1.01309	13.5161	15.0688	14.0529	13.8961	1.55096	1.78576	2.06084	1.75164	11.0104	12.4618	10.8471	10.9192	0.703168	1.23428	1.57214	1.05993	11.5847
I	40.8749	56.9714	60.5947	44.56	9.09276	23.9258	26.5254	7.27186	28.9255	28.1796	35.4539	5.61339	52.8368	56.0164	37.6686	46.1111	22.048	19.2823	22.3949	3.14119	16.6034	21.1514	23.0001	9.3856	1.83635	1.87082	2.02242	1.64485	0.702681	0.744496	0.72707	0.551461	13.2196	11.7256	13.6364	11.708	1.3366	3.8622	2.43076	1.26531	11.2651	8.18411	11.0618	9.85375	1.13231	3.16107	1.97164	1.00268	9.14405
J	64.4103	83.7821	34.9125	23.7552	66.5989	63.6811	63.8863	64.0645	35.4777	18.3866	6.51278	16.7265	34.0255	43.4975	40.6934	35.9505	38.0027	17.5961	5.41329	15.9415	10.6799	15.0015	11.8418	17.1845	2.46434	2.73542	2.63609	2.53632	0.501019	0.536321	0.491217	0.513663	12.033	12.281	11.8926	11.4254	1.24819	1.55036	1.16157	1.31123	10.3889	10.5763	10.3127	9.83787	0.797248	1.201	0.983337	0.9418	10.3889
K	32.7633	63.6193	52.7354	53.3352	50.1982	49.4037	46.8745	48.5869	11.0809	42.2803	21.7029	1.62235	6.17126	37.8972	13.1984	7.72252	18.3651	48.1615	30.0143	2.82578	20.182	25.8718	15.6844	10.969	1.91617	2.46825	2.18427	1.94752	1.44265	2.85372	2.00961	1.53925	14.2466	14.6447	15.5537	14.8425	1.28296	5.27109	3.39835	1.62297	11.4747	9.05322	11.3617	11.9851	1.3141	4.32071	2.88722	1.14544	11.3794
L	2.87524	59.1286	3.67721	7.99157	24.76	61.2395	20.9526	20.6592	14.5184	37.1662	10.2154	11.0913	0	15.2429	0	0	26.8736	39.713	22.7003	23.9064	18.4161	56.3593	17.5192	15.6313	1.83585	2.13871	2.05795	2.01031	1.76851	3.37784	1.52182	1.44367	11.984	12.3222	12.098	12.574	1.58373	4.23654	2.63904	2.21637	8.65512	8.40602	8.31076	9.02607	1.28824	3.32979	1.82482	1.58748	7.46245
M
	VL: vastus lateralis; MH: medial hamstring; TA: tibialis anterior; MG: medial gastrocnemius; SOL: soleus; GM: gluteus medius.
	b: baseline; e: early; l: late; p:post
	Var: variability (i.e., standard deviation)
	SW: step width; SL: step length; SWV: step width variability; SLV: step length variability
[truncated: 39 more columns]
